# Supplementary material for: Mulberry anthocyanin extract regulates glucose metabolism by promotion of glycogen synthesis and reduction of gluconeogenesis in human HepG2 cells
Source: Royal Society of Chemistry journal article supplement (doi:10.1039/c5fo00841g), 2015-09-29
Supplement: c5fo00841g1.pdf [file c5fo00841g1.pdf]

Table S1. Sequence of primers used for qPCR analysis.

| Gene name      | Genbank accession | Primer sequence (5'-3')  |
|----------------|-------------------|--------------------------|
| AKT1           | NM_005163         | ATCCTGGTCCTGTCTTCCTCA    |
|                |                   | TGTCCATGGTGTTCCTACCC     |
| FOXO1          | NM_002015         | TTCACCCAGCCCAAACCTACC    |
|                |                   | GAGTCCAGGCGCACAGTTAT     |
| PEPCK          | NM_002591         | GCTCTGAGGAGGAGAATGG      |
|                |                   | TGCTCTTGGGTGACGATAAC     |
| GSK3 $\beta$   | NM_002093         | AGACGCTCCCTGTGATTTATGT   |
|                |                   | CCGATGGCAGATTCCAAAGG     |
| PGC-1 $\alpha$ | NM_013261         | AGGTGCCTTCAGTTCACCTCTC   |
|                |                   | CCAACCAGAGCAGCACACTC     |
| GYS2           | NM_021957         | TGAAGTTGCTTGGGAAGTGAC    |
|                |                   | AGGTTCACACTGTTCCACCTG    |
| Actin          | NM_001101         | TCATGAAGTGTGACGTGGACATC  |
|                |                   | CAGGAGGAGCAATGATCTTGATCT |
